# Supplementary material
Source: PubMed Central journal article supplement (PMC3982758)
Supplement: supp_pp.113.234401_234401Supplemental_Fig_S1_Sakata_et_al.pdf [file supp_pp.113.234401_234401Supplemental_Fig_S1_Sakata_et_al.pdf]

## Miyagi Prefectural Furukawa Agricultural Experimental Station, Japan

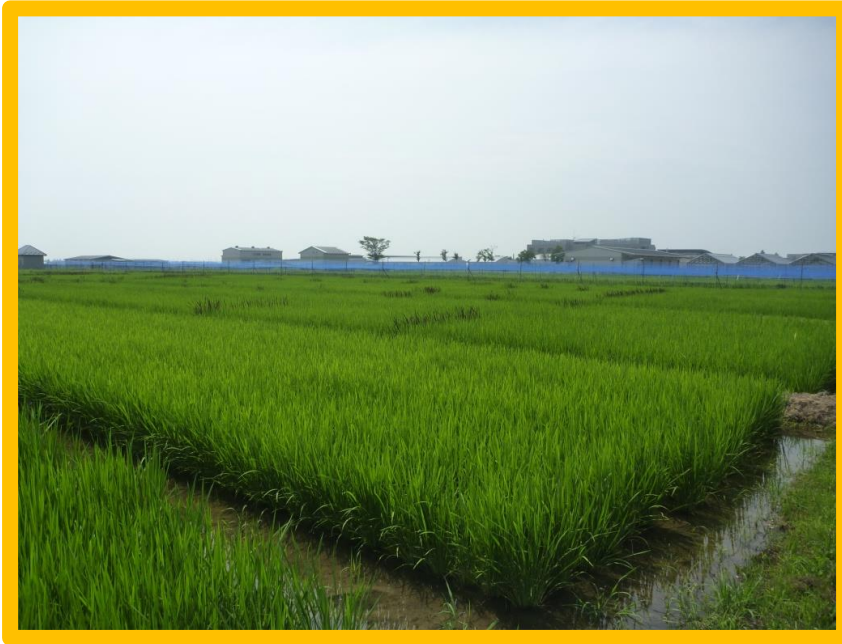

experimental paddy field

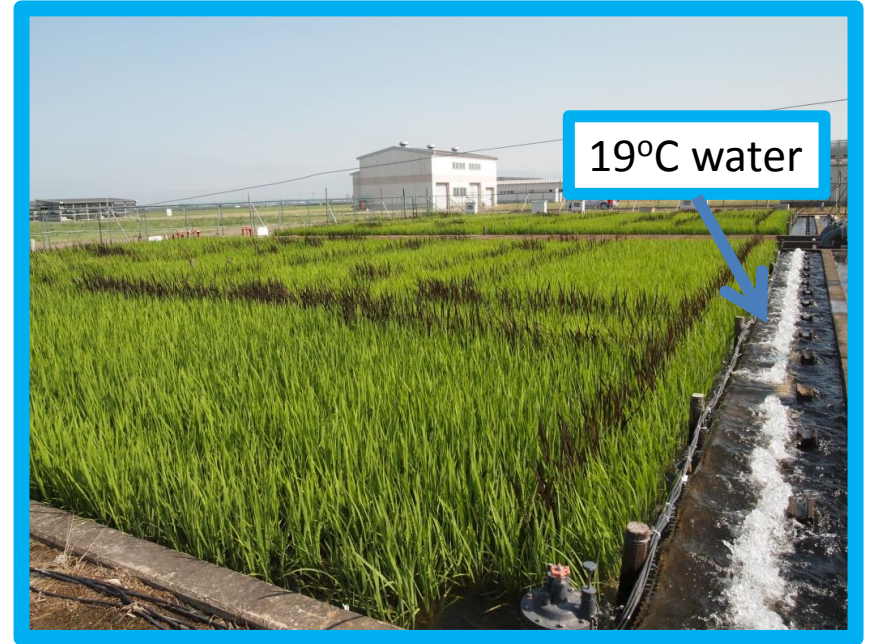

running cold-water paddy field

Supplemental Figure S1. Cool-temperature treatment was applied using a running cold-water system (19° C, 25 cm deep) from the panicle primordial stage to the completion of heading (about 2 months from early July to early September) in an experimental field at Miyagi Prefecture Furukawa Agricultural Experimental Station, Japan.
