# Supplementary material
Source: PubMed Central journal article supplement (PMC3982758)
Supplement: supp_pp.113.234401_234401Supplemental_Fig_S3_Sakata_et_al.pdf [file supp_pp.113.234401_234401Supplemental_Fig_S3_Sakata_et_al.pdf]

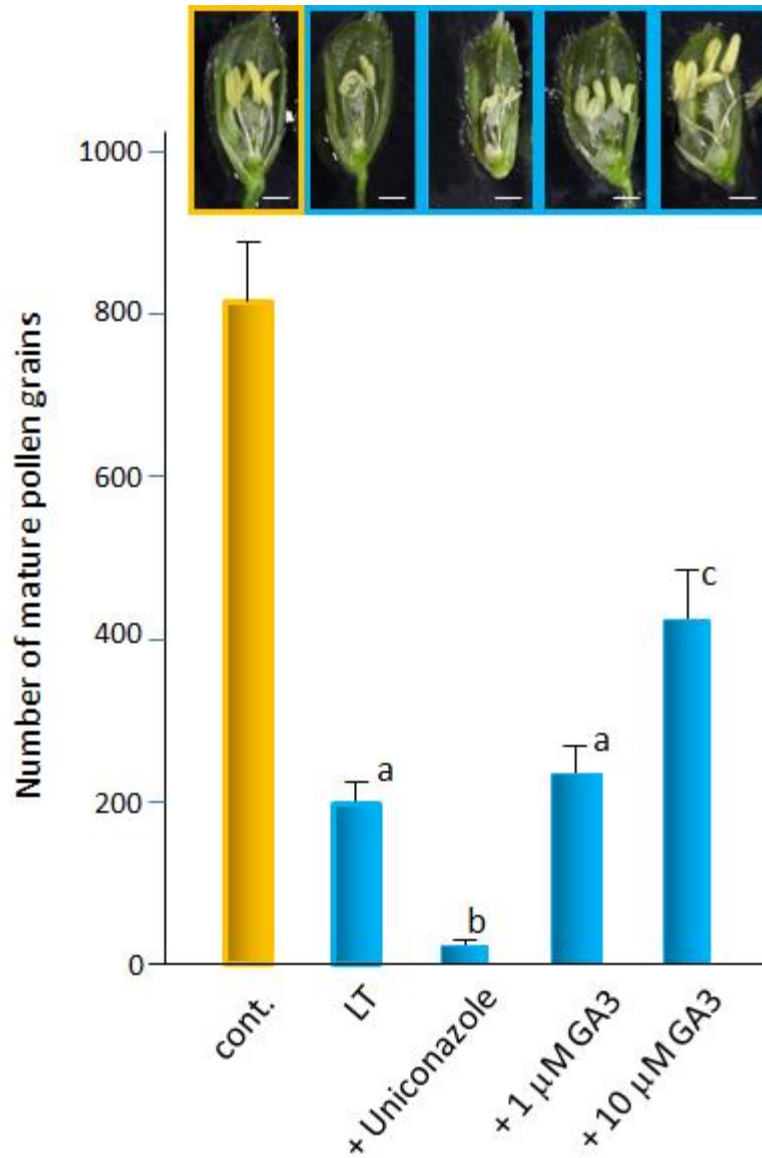

Supplemental Fig. S3. Exogenous GA application rescues pollen development in Nipponbare under low-temperature conditions. Representative features (pistil and anthers) are shown in spikelets dissected at the heading period with (LT, blue) or without (control, orange) low-temperature treatment. During the period of LT treatment, 0.001 ppm uniconazole (an inhibitor of GA biosynthesis), 1  $\mu\text{M}$  GA<sub>3</sub>, or 10  $\mu\text{M}$  GA<sub>3</sub> were added to the cool submersion water of different batches of test plants. The number of mature pollen grains was counted at each heading period ( $n=36$  anthers tested in each). Values are means  $\pm$  SE. Letters denote statistical differences with Tukey's test,  $P < 0.05$ .
